# Supplementary material for: Automated and Accurate Estimation of Gene Family Abundance from Shotgun Metagenomes
Source: PubMed Central journal article supplement (PMC4643905; doi:10.1371/journal.pcbi.1004573), 2015-11-13

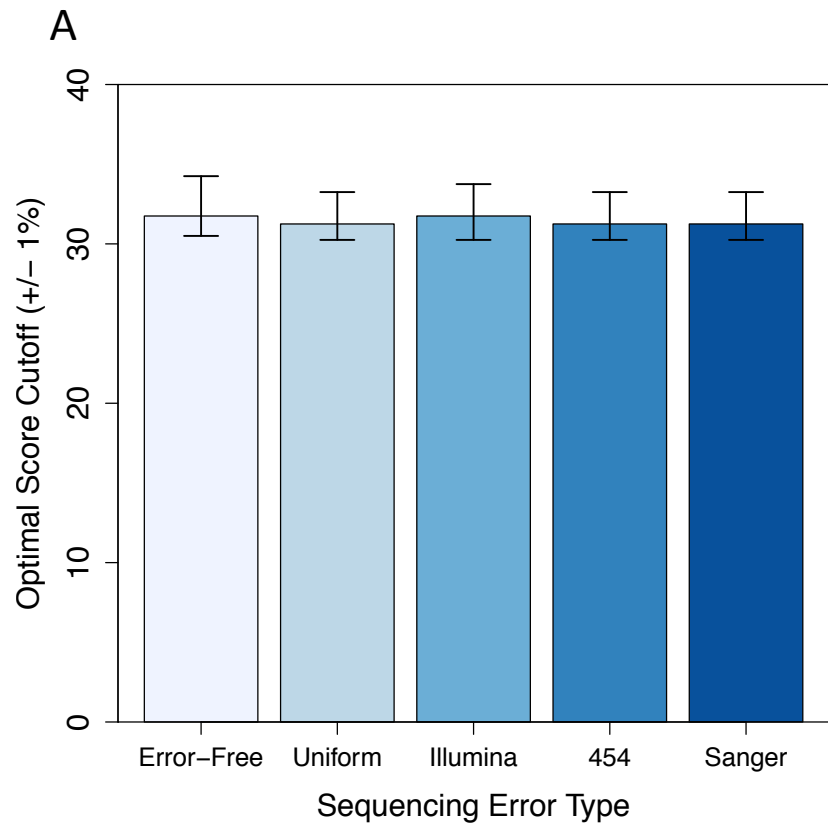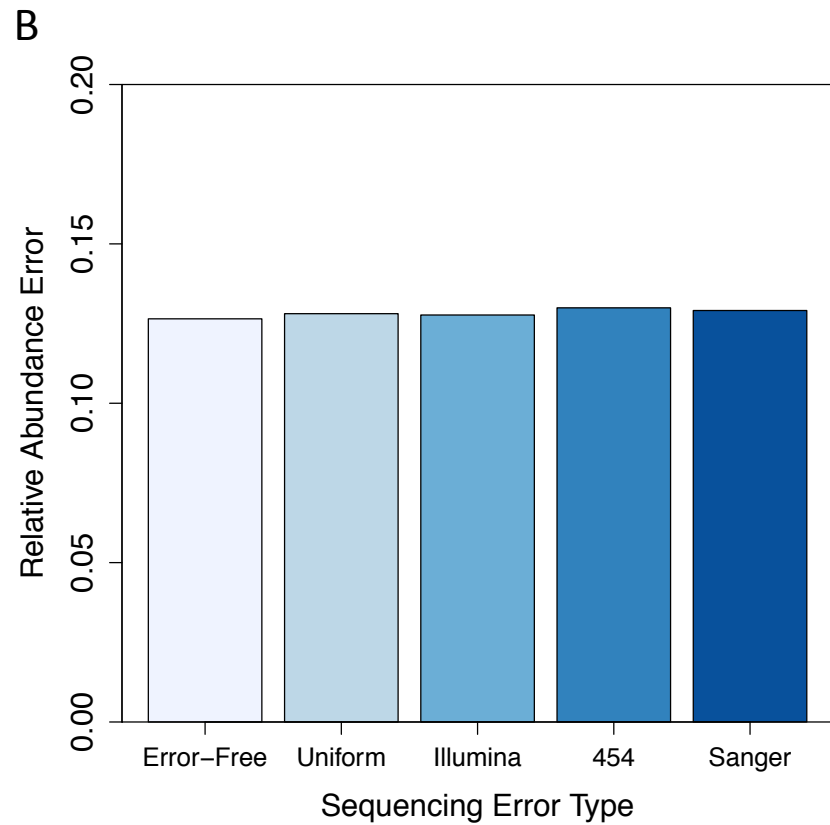

Supplement: pcbi.1004573.s007.pdf [file pcbi.1004573.s007.pdf]
